# Supplementary material
Source: PubMed Central journal article supplement (PMC9714689)
Supplement: NIHMS288838-supplement-1_si_001.pdf [file NIHMS288838-supplement-1_si_001.pdf]

## Supporting Information

# Creation of Stepwise Concentration Gradient in Picoliter Droplets for Parallel Reactions of Matrix Metalloproteinase II and IX

Sachin Jambovane<sup>1</sup>, Duck Jong Kim<sup>1,4</sup>, Evert C. Duin<sup>2</sup>, Se-Kwon Kim<sup>3</sup> and Jong Wook Hong<sup>1,\*</sup>

<sup>1</sup>Materials Research and Education Center, Department of Mechanical Engineering,  
Auburn University, Auburn, AL 36840

<sup>2</sup>Department of Chemistry and Biochemistry,  
Auburn University, Auburn, AL 36840

<sup>3</sup>Marine Bioprocess Research Center, Pukyong National University,  
Busan 608-737, Korea

<sup>4</sup>Korea Institute of Machinery and Materials, Dajeon 305-343, Korea

### Supplementary Figure Contents

**Figure S1.** Proteolytic cleavage of the peptide substrate, MMP substrate III.

**Figure S2.** Droplet in a rounded channel.

**Figure S3.** Standard curve of the fluorescent molecule, FAM, for off-chip experiments.

**Figure S4.** Time courses of the MMP-2 and MMP-9 reactions.

**Figure S5.** Schematic diagrams represent (a) Droplet scanning and (b) Plotting of fluorescence intensities of each droplet.

**Figure S6.** Kinetic parameters from off-chip experiments.

**Figure S7.** Photobleaching of FAM.

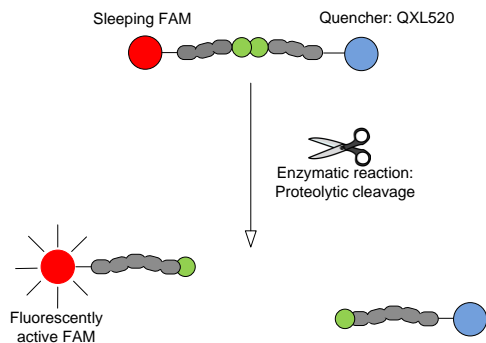

**Figure S1.** The peptide substrate contains a fluorophore, 5-carboxy-fluoresein-Pro-Leu-OH (FAM), and a quencher, QXL520. Upon proteolytic cleavage of the peptide substrate, the fluorescence of FAM is emitted, and the fluorescence signals are observed as an indicator of enzymatic reaction.

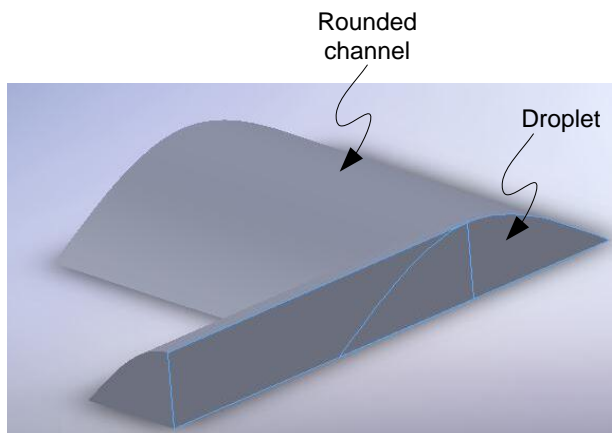

**Figure S2.** Variation of droplet height in the rounded channel.

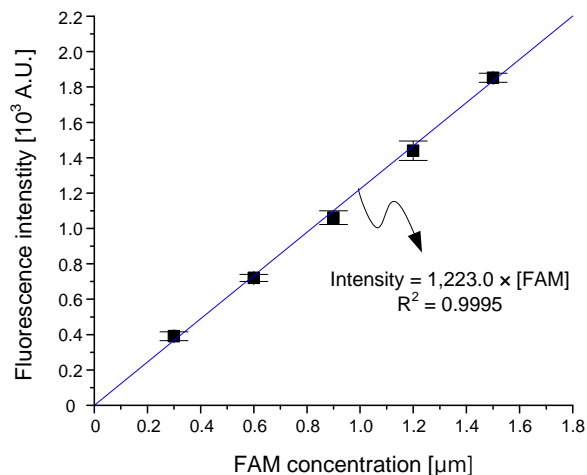

**Figure S3.** Standard curve of the fluorescent molecule, FAM (off-chip).

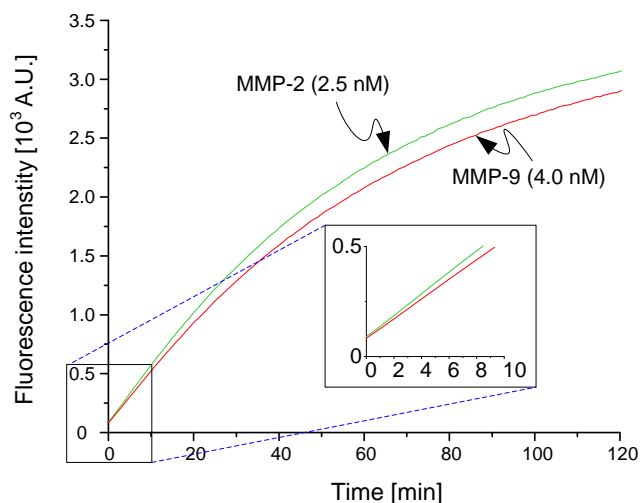

**Figure S4.** Time traces of enzymatic reaction of MMP-2 (2.5 nM) and MMP-9 (4.0 nM) with substrate concentration of 30  $\mu\text{M}$ . The velocities of these two reactions showed linear responses upto 10 min as shown in the inset figure.

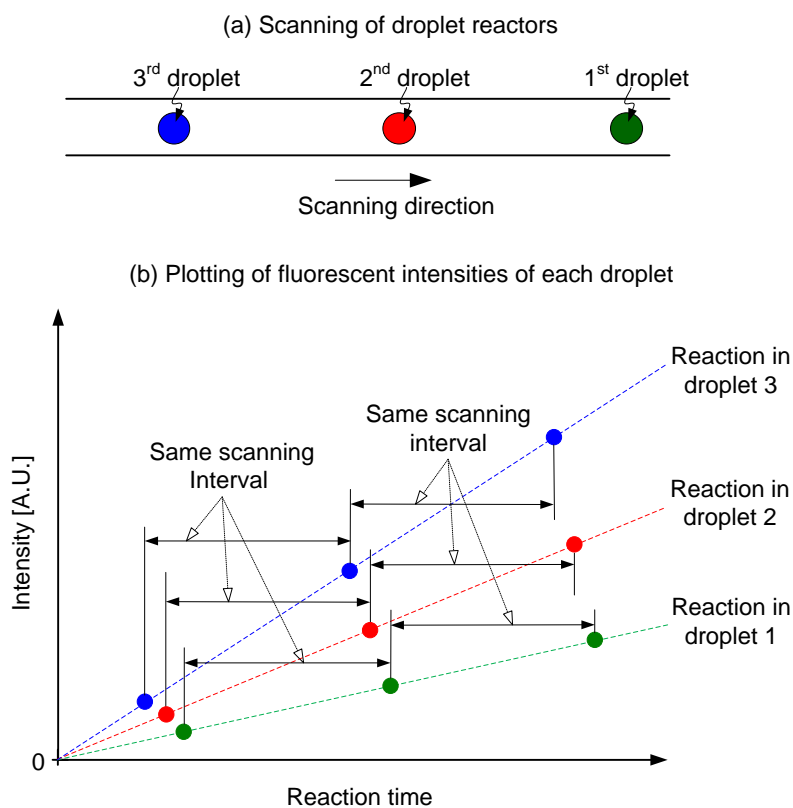

**Figure S5.** Scanning droplets and plotting of fluorescent signals.

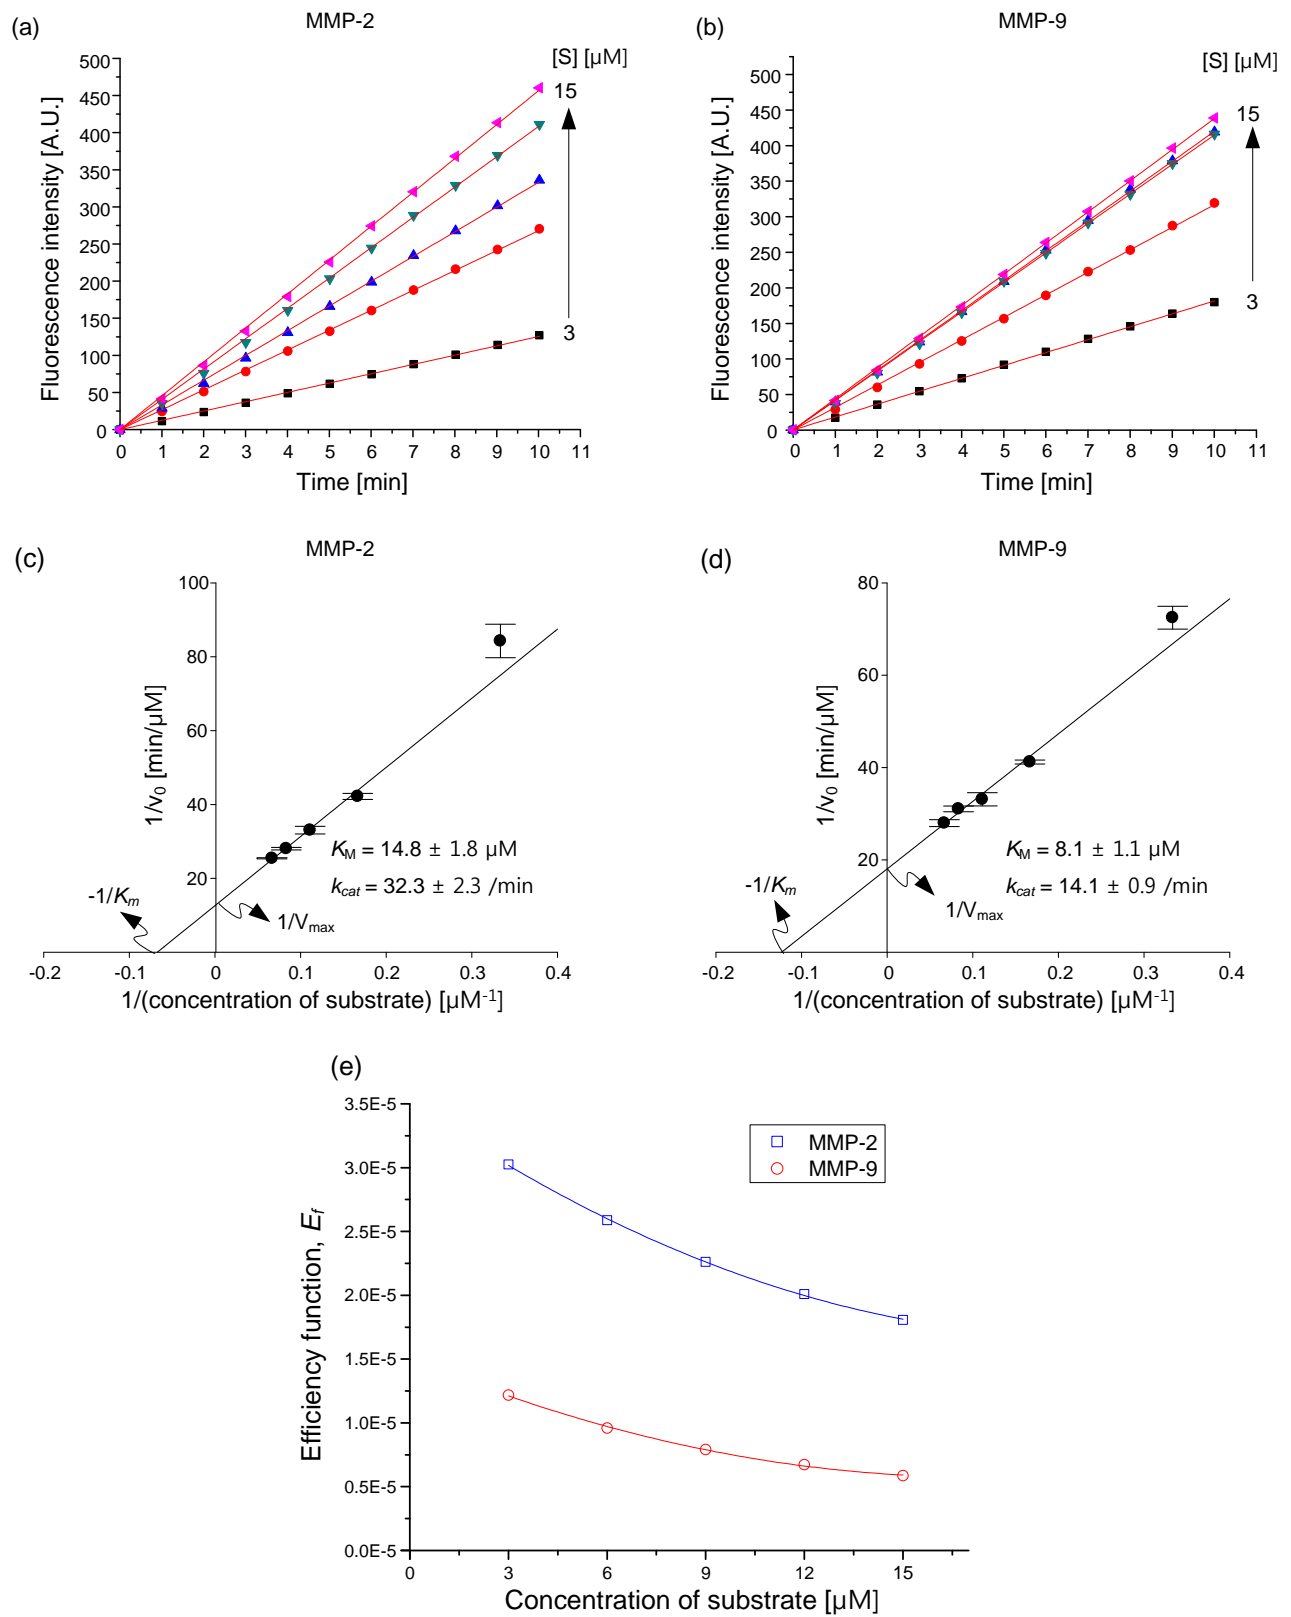

**Figure S6.** Determination of kinetic parameters using conventional, off-chip, methods. (a) and (b) The time scans of the MMP-2 and 9 reactions with different substrate concentrations. (c) and (d) Lineweaver-Burk kinetic plots. (e) Comparison of the efficiency function,  $E_f$ , of MMP-2 and MMP-9.

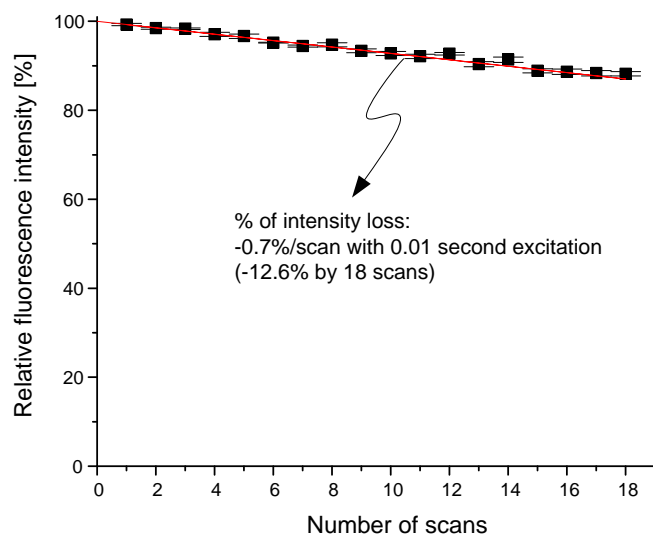

**Figure S7.** Effect of multiple scans on the photobleaching of FAM. About 0.7% of the fluorescent intensity was decreased with 0.01 s excitation at 490 nm.
